# Supplementary material for: Genetic Risk for Psychiatric Disorders and Telomere Length
Source: PubMed Central journal article supplement (PMC6232668; doi:10.3389/fgene.2018.00468), 2018-10-16
Supplement: Image_1.pdf [file Image_1.pdf]

# MELTING CURVES

## Telomere reaction

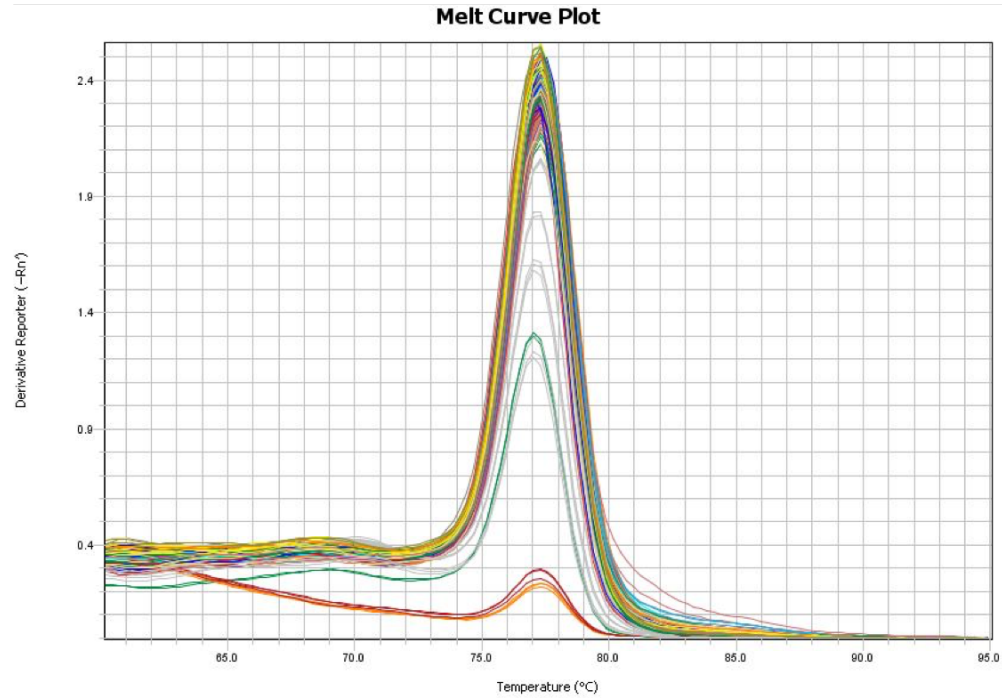

## Albumin reaction

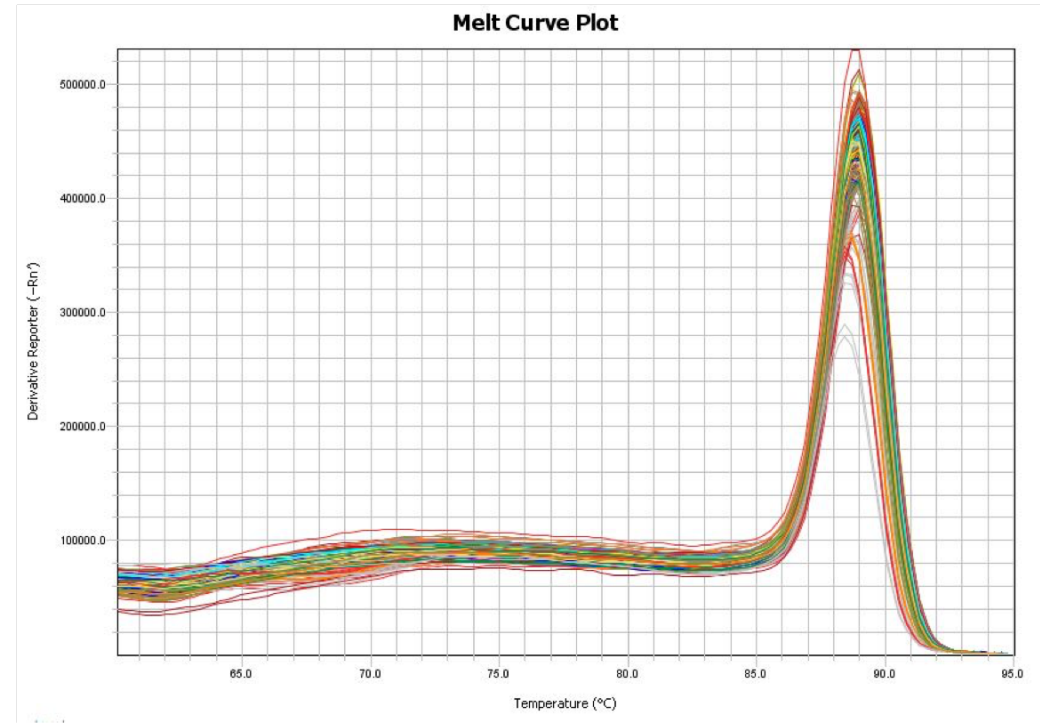

Note: For both reactions there was a single clear peak indicating the absence of non-specific amplification.
